# Supplementary material
Source: publisher site journal article supplement (https://www.spandidos-publications.com/4824/downloadSupplementary)

Figure S1. CD44, SOX9 and ABCG2 expression levles in cells with siRNA transfection. Changes in the expression of CD44, SOX9 and ABCG2 by siRNA transfection were confirmed using western blotting. R HSC-3, drug-resistant HSC-3; ABCG2, ATP-binding cassette subfamily G member 2; si, short interfering; SOX9, SRY-box transcription factor 9.

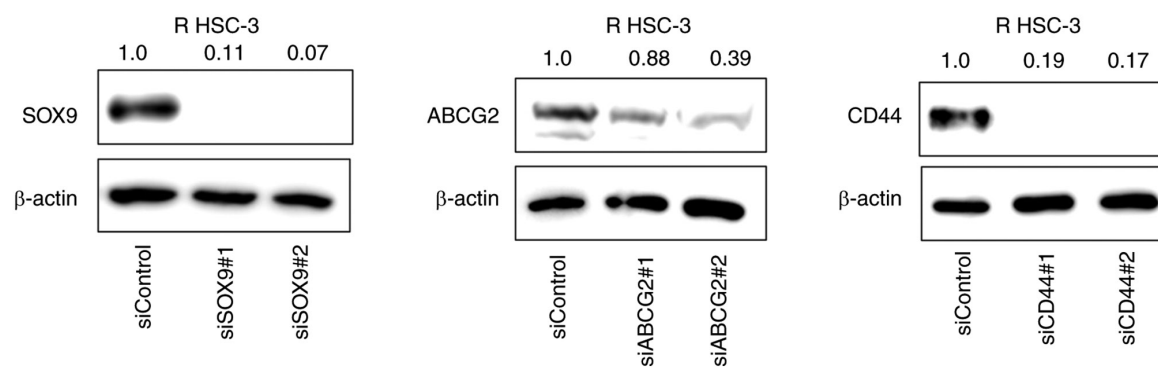

Supplement: Supplementary file 1 [file downloadSupplementary]
